# Supplementary material
Source: Springer Nature journal article supplement (https://www.springermedizin.de/resource/supplementary/13012_2013_652_MOESM2_ESM.pdf/9630424)
Supplement: MOESM2 [file 9630424]

a. Recruitment

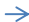

b. Baby Shower

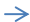

c. Baby Reception

**Prayer Sessions:** Each Sunday, the priest asks pregnant women to come to the altar to pray for safe pregnancy and delivery. The priest introduces the Healthy Beginning Initiative. Pregnant women and male partners who wish to participate are enrolled after signing an informed consent and completing a baseline questionnaire.

**Baby Shower:** One Sunday each month is designated as a ‘Healthy Beginning Sunday’ and baby shower when a reception with refreshment and dance is held for pregnant women and their families. ‘Edutainment’: Pregnant women and their families play an edutainment game that discusses healthy habits during pregnancy and necessary laboratory testing during pregnancy. ‘Integrated Laboratory Testing’: Free laboratory tests are offered to pregnant women and their male partners during the baby shower, including tests for hemoglobin; malaria; sickle cell genotype; HIV; hepatitis B; and syphilis. This integrated testing is designed to reduce stigma associated with an HIV-only testing approach. Women identified to be HIV+ are linked to PeTR-GS comprehensive HIV program.

**Baby Reception:** One Sunday every two to three months is set aside for a reception for babies born in the church. Baby gifts and refreshments are provided, and participants complete a post-delivery questionnaire that offers an opportunity to ascertain and document HIV testing during pregnancy, and pregnancy outcome. It also provides an opportunity for follow-up with women who may need ongoing care post-delivery.
